# Supplementary material for: Full Diacritization of the Arabic Text to Improve Screen Readers for the Visually Impaired
Source: Hindawi journal article supplement (doi:10.1155/2022/1186678), 2022-07-18
Supplement: f1 [file 1186678.f1.zip]

Archive with 2 entries (1 files):
- Supplementary Materials/
- Supplementary Materials/output.wav
